# Supplementary material for: Human pregnancy zone protein stabilizes misfolded proteins including preeclampsia- and Alzheimer’s-associated amyloid beta peptide
Source: PubMed Central journal article supplement — Proc Natl Acad Sci U S A. 2019 Mar 8;116(13):6101–10. doi: 10.1073/pnas.1817298116 (PMC6442606; doi:10.1073/pnas.1817298116), 2019-03-08
Supplement: pnas.1817298116.sapp.pdf [file pnas.1817298116.sapp.pdf]

## Supplementary Information for

### **Human pregnancy zone protein stabilizes misfolded proteins including preeclampsia- and Alzheimer's-associated amyloid beta peptide**

**Authors and affiliations:** Jordan H. Cater<sup>a,b</sup>, Janet R. Kumita<sup>c</sup>, Rafaa Zeineddine Abdallah<sup>a,b</sup>, Guomao Zhao<sup>d,1</sup>, Ana Bernardo-Gancedo<sup>c</sup>, Amanda Henry<sup>e,f,g</sup>, Wendy Winata<sup>e</sup>, Mengna Chi<sup>a,b,2</sup>, Brin S. F. Grenyer<sup>a,h</sup>, Michelle L. Townsend<sup>a,h</sup>, Marie Ranson<sup>a,b</sup>, Catalin S. Buhimschi<sup>i,1</sup>, D. Stephen Charnock-Jones<sup>j,k,1</sup>, Christopher M. Dobson<sup>c</sup>, Mark R. Wilson<sup>a,b</sup>, Irina A. Buhimschi<sup>d,m,n,1</sup>, and Amy R. Wyatt<sup>a,b,o,3</sup>

<sup>a</sup>Illawarra Health and Medical Research Institute, Wollongong, NSW 2522, Australia;

<sup>b</sup>School of Chemistry and Molecular Bioscience, University of Wollongong, Wollongong,

NSW 2522, Australia; <sup>c</sup>Centre for Misfolding Diseases, Department of Chemistry,

University of Cambridge, CB2 1EW Cambridge, United Kingdom; <sup>d</sup>Center for Perinatal

Research, The Research Institute at Nationwide Children's Hospital, Columbus, OH

43205; <sup>e</sup>School of Women's and Children's Health, University of New South Wales

Medicine, Sydney, NSW 2052, Australia; <sup>f</sup>The George Institute for Global Health,

University of New South Wales, Sydney, NSW, 2052, Australia; <sup>g</sup>Women's and Children's Health, St George Hospital, Kogarah, NSW 2217, Australia; <sup>h</sup>School of Psychology, University of Wollongong, Wollongong, NSW 2522, Australia; <sup>i</sup>Department of Obstetrics and Gynecology, The Ohio State University College of Medicine, Columbus, OH 43210; <sup>j</sup>National Institute for Health Research Cambridge Biomedical Research Centre, Cambridge, CB2 0QQ, United Kingdom; <sup>k</sup>Department of Obstetrics and Gynaecology, University of Cambridge, Cambridge, CB2 0SW, United Kingdom; <sup>l</sup>Centre for Trophoblast Research, University of Cambridge, CB2 0QQ Cambridge, United Kingdom; <sup>m</sup>Department of Pediatrics, The Ohio State University College of Medicine, Columbus, OH 43210; <sup>n</sup>Division of Maternal-Fetal Medicine, Department of Obstetrics and Gynecology, The Ohio State University College of Medicine, Columbus, OH 43210; and <sup>o</sup>College of Medicine and Public Health, Flinders University, Bedford Park, SA 5042, Australia

<sup>1</sup>Current address: Department of Obstetrics and Gynecology, University of Illinois at Chicago College of Medicine, 820 Wood Street, Chicago IL 60612, USA

<sup>2</sup>Current address: School of Biomedical Sciences and Pharmacy, Faculty of Health and Medicine, University of Newcastle, Callaghan, NSW, 2308, Australia and Priority Research Centre for Cancer Research, Innovation & Translation, Faculty of Health & Medicine, Hunter Medical Research Institute, New Lambton Heights, NSW, 2305 Australia

<sup>3</sup>**Corresponding author:** Amy R. Wyatt; Address: College of Medicine and Public Health, Flinders University, South Australia, 5042, Australia; Phone: +61 8 8204 4260; Email: amy.wyatt@flinders.edu.au

**This PDF file includes:**

Supplementary text  
Figs. S1 to S5  
Table S1

## **Supplementary Information Text**

### **PZP co-localises with A $\beta$ in extravillous trophoblasts (EVT).**

This cluster of cells captured in preeclamptic placenta (Fig. S4A) indicates that PZP and A $\beta$  co-localize in the EVT cytoplasm (Fig. S4B). An unexpected finding clearly visible using confocal microscopy was the nuclear localization of PZP into trophoblasts with perturbed morphology. In some EVT nuclei the blue DAPI fluorescence was entirely replaced by that of PZP whereas in other cells the two proteins coexisted as illustrated by the merged purple staining (Fig. S4 C&D).

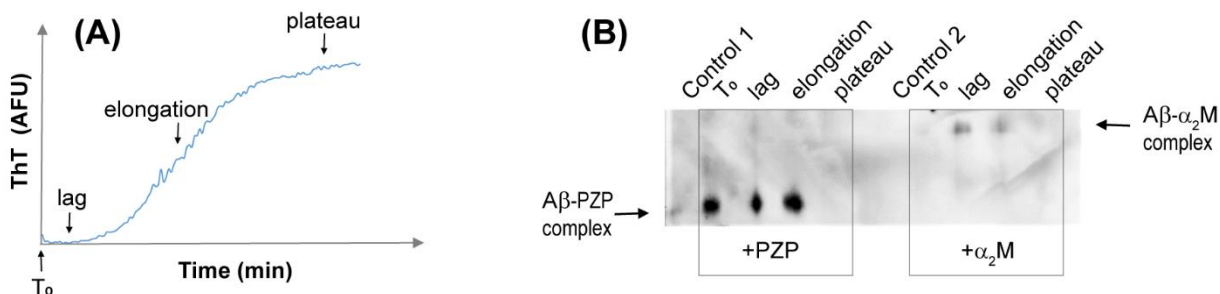

**Fig. S1. Image of a native Western blot showing the co-migration of monomeric and aggregated A $\beta_{1-42}$  with native PZP or  $\alpha_2M$ .** (A) A $\beta_{1-42}$  (5  $\mu M$ ) was induced to aggregate using the standard protocol for ThT assay involving incubation at 32°C with constant shaking and aliquots were removed as indicated at  $T_0$  and during the lag, elongation and plateau phase. (B) A $\beta_{1-42}$  as described in (A) was subsequently incubated with native PZP or  $\alpha_2M$  at a 1:10 molar ratio ( $\alpha M$ -to-A $\beta_{1-42}$ ) for 30 min at ambient room temperature. The migration of A $\beta_{1-42}$  was probed for by native Western blot analysis. A $\beta_{1-42}$  incubated in the absence of  $\alpha M$  (control 1- taken at  $T_0$  and control 2 taken at elongation, as in (A)) migrate to the end of the gel and are not visible. A $\beta_{1-42}$  retained at the approximate positions of the native PZP dimer and the native  $\alpha_2M$  tetramer are indicated.

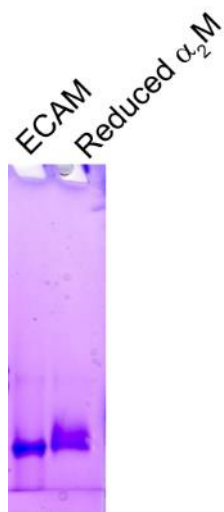

**Fig. S2. Native gel image of recombinant ECAM.** Image of an Instant Blue stained 3-8% Tris acetate native gel showing the migration of recombinant purified ECAM and reduced  $\alpha_2M$ .

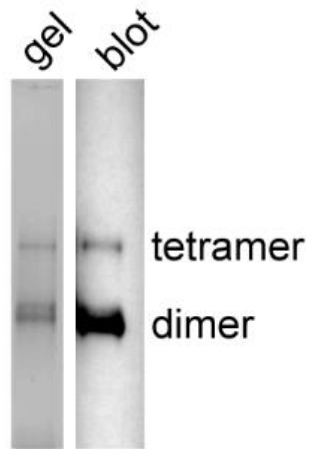

**Fig. S3. Preferential binding of PZP antibody to dimeric PZP.** PZP-protease complexes were generated by pre-incubation of PZP with chymotrypsin at a 2:1 molar ratio of PZP-to-chymotrypsin for 30 min at 37°C. Equivalent amounts of the preparation were then analysed by native gel electrophoresis or native Western blot, with probing of the blot accomplished using PZP antibody.

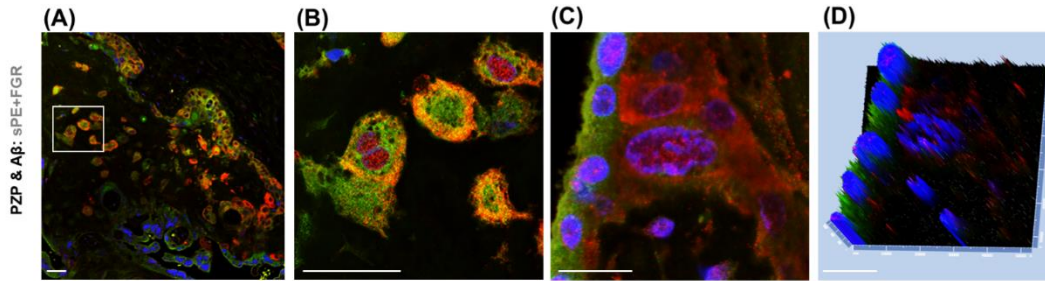

**Fig. S4 Intracellular location of PZP and A $\beta$  in SPE placenta** (A) Extravillous trophoblasts co-staining for PZP (red) and A $\beta$  (green) in various patterns. (B) The boxed region in A shown at higher magnification. (C) Higher magnification image of the region demarcated by the box in panel A showing co-localization of PZP with DAPI (blue) in some trophoblast nuclei visualized as purple fluorescence persistent after 3D z-stack reconstruction (D). Scale bar represents 50  $\mu$ m.



```

=====
#
# Aligned_sequences: 2
# 1: EMBOSS_001 PZP theoretical Aβ binding region
# 2: EMBOSS_001 α2M Aβ binding region and flanking regions (amino acids 1291-1394)
# Matrix: EBLOSUM62
# Gap_penalty: 12
# Extend_penalty: 2
#
# Length: 104
# Identity:      86/104 (82.7%)
# Similarity:    94/104 (90.4%)
# Gaps:          0/104 ( 0.0%)
# Score: 445
#
#
=====

EMBOSS_001      1  QVDN>NNLLLLLQQLSLPELPG EYVITVTGERC VYLQTS MKYNILPEKEDSP      50
      | | | | | . | | | | : | | | | | | | | . . | | | | . | | | | | : | | | | | | | | . |
EMBOSS_001      1  QVDN>NNRLLLQOVSLPELPG EYSMKVVTGEGC VYLSLKY NILPEKEEFP      50

EMBOSS_001     51  FALKVQTVPQTC DGHKAHTSFQISL TISYTG NR PASNMVIV DVK M VSGFI     100
      | | | . | | | : | | | | | . . | | | | | | | | : | | | | : | . | | | . | | | | | | | |
EMBOSS_001     51  FALGVQTL PQCDEPKAHTSFQISLSV SYTGSR SASNMAI VDVK M VSGFI     100

EMBOSS_001     101  PLKP          104
      | | | |
EMBOSS_001     101  PLKP          104

```

**Fig. S5. Sequence alignment of the cryptic binding site on  $\alpha_2M$  for monomeric A $\beta$  and corresponding region of PZP.** Pairwise sequence alignment of the binding site for monomeric A $\beta$  on  $\alpha_2M$  as described by (1) and the corresponding region of PZP as performed using EMBOSS stretcher (2).

**Table S1: Clinical characteristics of mothers and newborns that contributed placenta samples**

| Variables                          | Idiopathic preterm birth (IPTB, n=8) | Severe preeclampsia (sPE, n=11) | P value |
|------------------------------------|--------------------------------------|---------------------------------|---------|
| Maternal age, years *              | 25 ± 7                               | 25 ± 9                          | 0.953   |
| Nulliparity †                      | 4 (50)                               | 8 (73)                          | 0.377   |
| Non-Caucasian race †               | 4 (50)                               | 4 (36)                          | 0.658   |
| Systolic blood pressure, mmHg *    | 120 ± 10                             | 164 ± 17                        | <0.001  |
| Diastolic blood pressure, mmHg *   | 65 ± 5                               | 102 ± 12                        | <0.001  |
| Dipstick proteinuria ‡             | 0 [0-0]                              | 3 [2-3]                         | <0.001  |
| 24 h proteinuria, grams *          | NA                                   | 2.2 ± 1.8                       | NA      |
| Fetal growth restriction †         | 0 (0)                                | 7 (64)                          | 0.013   |
| Prelabor rupture of membranes †    | 3 (38)                               | 0 (0)                           | 0.058   |
| Antenatal steroid administration † | 8 (100)                              | 9 (82)                          | 0.485   |
| Magnesium sulfate administration † | 5 (63)                               | 11 (100)                        | 0.058   |
| Gestational age at birth, weeks *  | 30 ± 2                               | 30 ± 3                          | 0.453   |
| Cesarean delivery †                | 4 (50)                               | 11 (100)                        | 0.018   |
| Newborn male sex †                 | 2 (25)                               | 3 (27)                          | 1.000   |
| Birth weight *                     | 1633 ± 351                           | 1076 ± 394                      | 0.005   |
| Apgar 1 min ‡                      | 8 [7-9]                              | 6 [4-7]                         | 0.092   |
| Apgar 5 min ‡                      | 9 [8-9]                              | 8 [8-9]                         | 0.195   |

\* Data presented as mean ± standard deviation and analyzed by Student's t-test

† Data presented as n (%) and analyzed by Fisher's exact test

‡ Data presented as median [interquartile range] and analyzed by Mann-Whitney test

As expected, mothers in the sPE group have higher blood pressures and proteinuria levels and a higher frequency of fetal growth restriction. Their newborns had a lower birthweight and were more often delivered through Cesarean. There were no statistically significant differences in maternal age, nulliparity, antenatal steroid and magnesium sulfate exposure, gestational age at birth, newborn sex distribution and Apgar scores.

## References

1. Mettenburg JM, Webb DJ, & Gonias SL (2002) Distinct binding sites in the structure of alpha 2-macroglobulin mediate the interaction with beta-amyloid peptide and growth factors. *The Journal of biological chemistry* 277(15):13338-13345.
2. Myers EW & Miller W (1988) Optimal alignments in linear space. *Comput Appl Biosci* 4(1):11-17.
